# Supplementary material
Source: PubMed Central journal article supplement (PMC3523252)
Supplement: Supp_Fig1.pdf [file Supp_Fig1.pdf]

## Supplementary Data

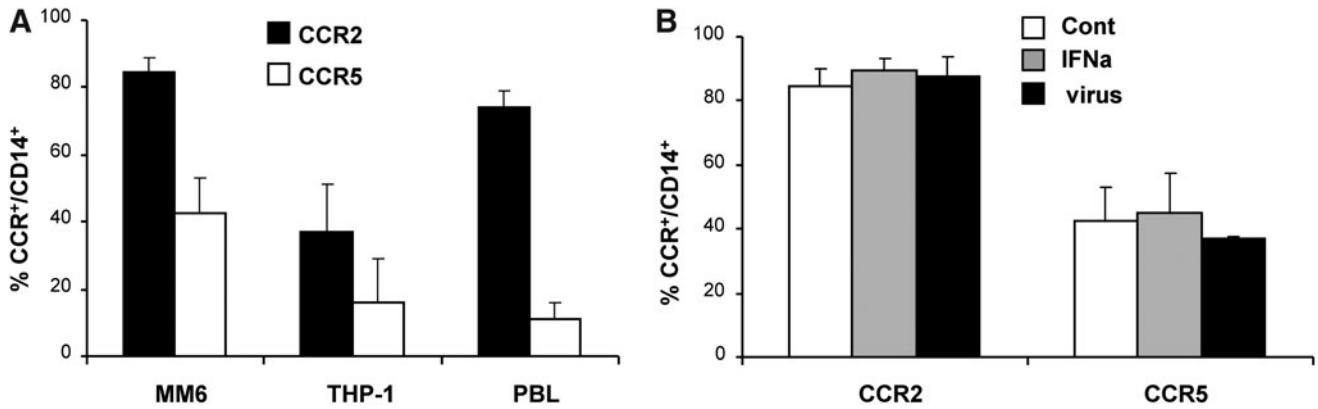

**SUPPLEMENTARY FIG. S1.** Expression of CCR2 and CCR5 in monocytes and monocytic cell lines. **A**, MM6, THP-1 cell lines and freshly isolated human peripheral blood leucocytes (PBL) were stained with anti-CD14, CCR2 and CCR5 fluorescence-labeled antibodies. The percentage of CD14<sup>+</sup> cells that display CCR2 and CCR5 on their surface was analyzed by flow cytometry and is represented in black and white columns, respectively. **B**, MM6 were treated with IFN $\alpha$  (grey columns), infected with Ad-WTLuc (black columns) during 4 hr or left untreated (white columns). Expression of CCR2 and CCR5 was analyzed 16 hr later.
