# Supplementary material
Source: PubMed Central journal article supplement (PMC3523252)
Supplement: Supp_Fig2.pdf [file Supp_Fig2.pdf]

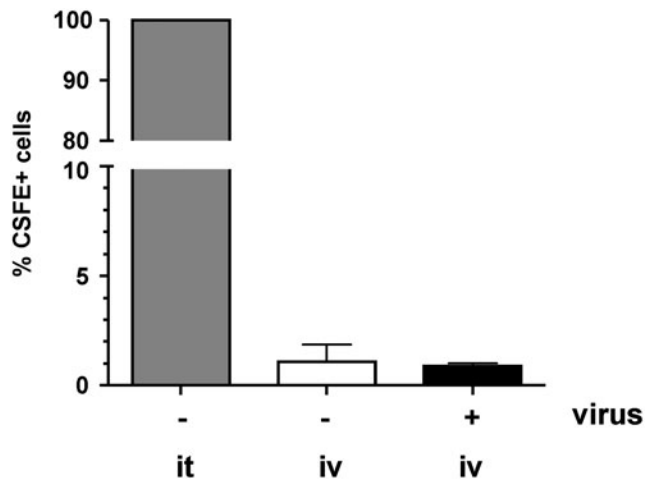

**SUPPLEMENTARY FIG. S2.** Tumor homing of CFSE-labeled monocytes in tumor xenografts. Tumors were established in athymic mice by subcutaneous inoculation of HuH-7 cells. MM6 cells ( $4 \times 10^6$ /mouse) were infected with Ad-WTLuc during 4 hr (virus+) or left untreated (virus -). All cells were then labeled with CFSE and administered by intravenous (iv) or intratumoral (it) injection. Tumors were harvested 24 hr later and the presence of CFSE<sup>+</sup> cells was determined by flow cytometry. The percentage of cells is represented, considering the intratumoral administration as 100%.
