# Supplementary material
Source: PubMed Central journal article supplement (PMC3523252)
Supplement: Supp_Fig3.pdf [file Supp_Fig3.pdf]

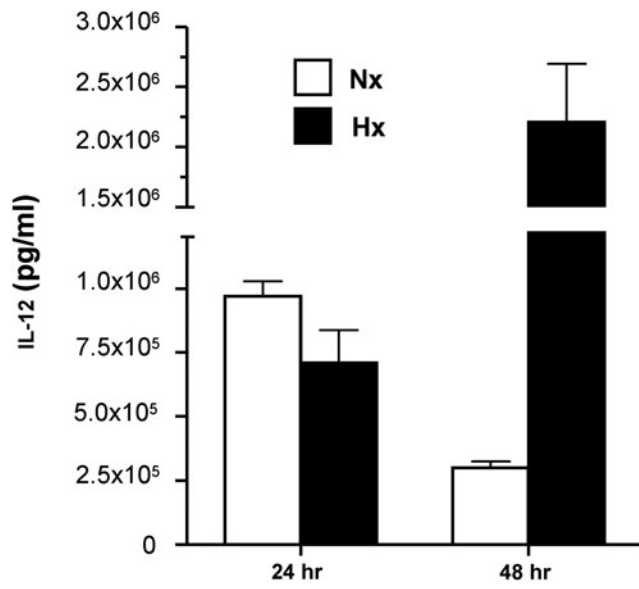

**SUPPLEMENTARY FIG. S3.** Expression of IL-12 in HM-1 cells infected with Ad-IL12G. HM-1 cells maintained under normoxic (Nx) or hypoxic (Hx) conditions were infected at a MOI 100 with Ad-IL12G. Production of IL-12 was quantified by ELISA in the supernatants 24 or 48 hr after infection.
